# Supplementary material for: Raindrop Fall Velocities from an Optical Array Probe and 2D-video Disdrometer
Source: Copernicus journal article supplement (doi:10.5194/amt-2017-401), 2017-11-09
Supplement: Supplementary file [file amt-2017-401-AC2-supplement.pdf]

Interactive comment on “Raindrop Fall Velocities from an Optical Array Probe and 2D-video Disdrometer” by Viswanathan Bringi et al. Anonymous Referee #5

**Response to Reviewer # 5**

***We appreciate the reviewer’s comments and our response is given in blue bold italics. The modifications to revised manuscript based on earlier 4 reviews (major revision) are attached and highlighted. The modifications of the manuscript based on this last review are very minor but included also.***

*This manuscript is a summary of observations of the fall speeds of small raindrops near the ground, in a field setting. It is comforting to see that the observations are generally consistent with the familiar Gunn and Kinzer laboratory measurements in conditions not strongly affected by wind and turbulence.*

In the latter situation the measured fall speeds tended to be less, and therein lays a puzzle that warrants more discussion in the manuscript. Certainly turbulence in the low atmosphere could increase the spread of the drop fall speeds, but it does not produce a significant vertical mass flux. If the turbulence were isotropic (which may not be the case here) Stout et al. did find indications of reduced fall speeds. However, it’s not clear why there would not be a similar neutral effect on the overall raindrop flux. If the drops are falling at normal terminal speeds in the free atmosphere and at reduced speeds near the surface there would have to be an accumulation of rain at some level above the disdrometer. Of course there might be intermittent episodes of “super-“ and “sub-terminal” fall speeds but the duration of the latter in the observations is a substantial fraction of an hour. I do not have an explanation but invite the authors to offer one, or at least discuss the subject.

***Response to General Comments: What the reviewer is assuming as best as we can ascertain is related to the sedimentation of raindrops i.e., time rate of change of mass equals negative of the height derivative of  $mVt$ . This neglects other important processes such as evaporation and source/sink terms for coalescence-breakup. Plus the fall speeds increase at lower pressure aloft. We do not feel we can offer any more explanation and hence no modifications to the manuscript have been made.***

*My other comments are relatively minor:*

There are instances of singular-plural subject-verb disagreement in the manuscript.

***The manuscript has been revised substantially in response to Reviews 1-4 which is now attached to this response.***

L15ff: “micron” is not an SI unit (and compare with L57).

***We have changed ‘microns’ to ‘ $\mu m$ ’ throughout the text.***

L41: The authors might add the very useful fall speed relationship from Uplinger (Uplinger WG. 1989. A new formula for raindrop terminal velocity. Preprints, 20th Conference Radar Meteorology, 389–391).

*In our revised manuscript we have used the fit of Foote and du Toit (1969) to replace the fit of Atlas et al. (1973). The figure below compares the Foote and du Toit fit to Uplinger (1977). Since the agreement is excellent we feel no need to use the latter fit and hence no modifications have been made to the manuscript.*

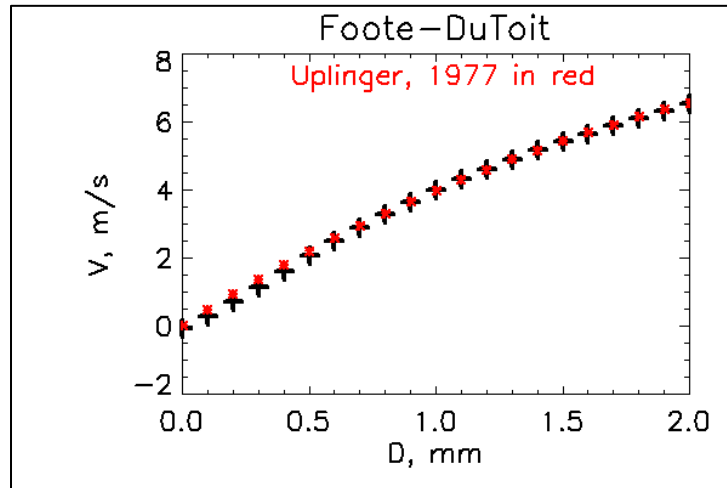

L81-103 (maybe 105-115 as well): What about possible edge effects on the measurements?

Under the conditions listed in L199-207, a 1 mm drop at terminal fall speed would approach the instrument at an angle of <22 deg from horizontal. Viewing the measurement plane from that angle, there's a lot more edge than when the approach is vertical.

*The 2DVD and MPS instruments were collocated inside a DFIR wind shield so the drop trajectories are different as opposed to un-shielded case. Note also that the DFIR reduces the wind speed at the center of the fence by nearly a factor of three relative to the environment wind speed. The edge effect under strong horizontal winds can be easily noted by partial filling of the 2DVD's 10X10 cm sensor area which is not the case as shown in figure below, i.e., the 2 mm drops uniformly fill the sensor area during the high wind period of the squall lines (0600-1000 UTC) in Fig. 4.*

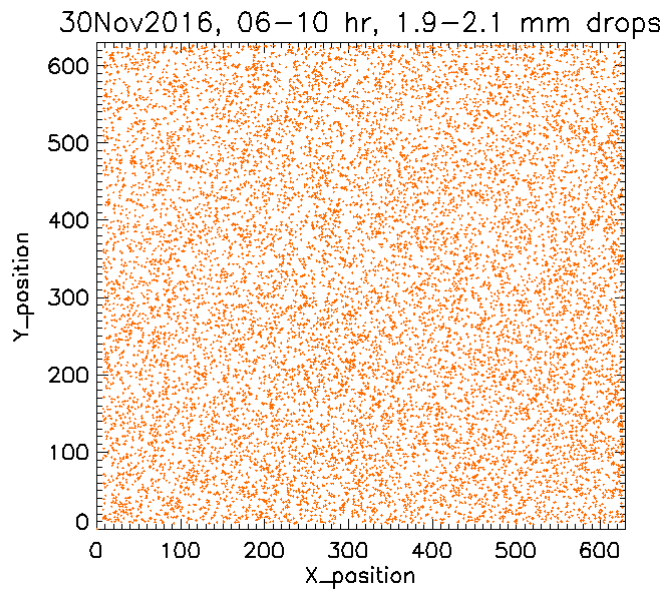

*Each point is the location of drop in the 10X10 cm sensor area of the 2DVD. All drops in the range 1.9-2.1 mm during the time segment 0600-1000 UTC on 30 Nov 2016 are shown.*

L89: How does the “true air speed clock” work in this situation?

*We understand the question posed by the reviewer although the effect that the reviewer is referring to will depend on the trajectory of the drop with respect to the diode array. We use the fin (wind vane) to minimize the angle issue, i.e. if the array is completely perpendicular to the trajectory of the drop, the horizontal motion of the drop will have no impact. If, however, in the worse case the drop trajectory is parallel to the array, there can be a potential for oversizing but the error will still be quite small since the amount of time that it takes to capture the image slice is very small compared to how far across the array a droplet travels horizontally during that time. In other words, the captured image appears as if it is going through at an angle, but the maximum width will still be the same as the drop.*

*We note that in our paper the MPS was configured without a wind vane as it was sited inside the DFIR wind shield. The diode array was oriented perpendicular to the environmental mean wind direction for both Greeley and Huntsville site.*

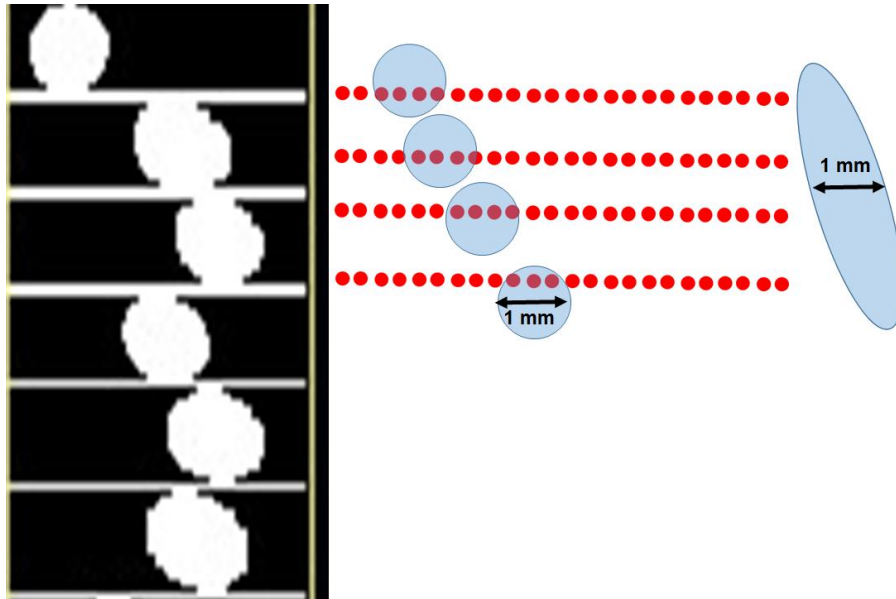

*Sample of drop images recorded by the MPS. Schematic of drop whose trajectory is parallel to the diode array.*

L162: The expression in parentheses is not what is really meant.

*We have deleted the expression in parenthesis as it is not necessary. Thank you for pointing this out.*

L230: "...panel 5 (b,d)."

*Corrected. Thank you.*

L251-252: If these (1 and 5) are fall speeds, include the units. Fig. 3a: Any clue what caused the MPS hiccup after 1.5 mm size?

*Units inserted as suggested. The revised figure does not have the "hiccup".*

# Raindrop Fall Velocities from an Optical Array Probe and 2D-Video Disdrometer

Viswanathan Bringi<sup>1</sup>, Merhala Thurai<sup>1</sup> and Darrel Baumgardner<sup>2</sup>

<sup>1</sup> *Department of Electrical and Computer Engineering, Colorado State University, Fort Collins, Colorado, USA*

<sup>2</sup> *Droplet Measurements Technologies, Longmont, Colorado, USA*

Correspondence to: V.N. Bringi

Email: [bringi@colostate.edu](mailto:bringi@colostate.edu)

## Abstract

We report on fall speed measurements of rain drops in light-to-heavy rain events from two climatically different regimes (Greeley, Colorado, and Huntsville, Alabama) using the high resolution (50  $\mu\text{m}$ ) Meteorological Particle Spectrometer (MPS) and a 3<sup>rd</sup> generation (170  $\mu\text{m}$  resolution) 2D-video disdrometer (2DVD). To mitigate wind-effects, especially for the small drops, both instruments were installed within a 2/3-scale Double Fence Intercomparison Reference (DFIR) enclosure. Two cases involved light-to-moderate wind speeds/gusts while the third case was a tornadic supercell and several squall-lines that passed over the site with high wind speeds/gusts. As a proxy for turbulent intensity, maximum wind speeds from 10-m height at the instrumented site recorded every 3 s were differenced with the 5-min average wind speeds and then squared. The fall speeds versus size from 0.1-2 mm and >0.7 mm were derived from the MPS and the 2DVD, respectively. Consistency of fall speeds from the two instruments in the overlap region (0.7-2 mm) gave confidence in the data quality and processing methodologies. Our results indicate that under low turbulence, the mean fall speeds agree well with fits to the terminal velocity measured in the laboratory by Gunn and Kinzer from 100  $\mu\text{m}$  up to precipitation sizes. The histograms of fall speeds for 0.5, 0.7, 1 and 1.5 mm sizes were examined in detail under the same conditions. The histogram shapes for the 1 and 1.5 mm sizes were symmetric and in good agreement between the two instruments with no evidence of skewness or of sub- or super-terminal fall speeds. The histograms of the smaller 0.5 and 0.7 mm drops from MPS while generally symmetric showed that occasional occurrences of sub- and super-terminal fall speeds could not be ruled out. In the supercell case, the very strong gusts and inferred high turbulence intensity caused a significant broadening of the fall speed distributions with negative skewness (for drops of 1.3, 2 and 3 mm). The mean fall speeds were also found to decrease nearly linearly with increasing turbulent intensity attaining values about 25-30% less than the terminal velocity of Gunn-Kinzer, i.e. sub-terminal fall speeds.

# 1 Introduction

Knowledge of the terminal fall speed of raindrops as a function of size is important in modelling collisional break-up and coalescence processes (e.g., *List et al.*, 1987), in the radar-based estimation of rain rate, in retrieval of drop size distribution using Doppler spectra at vertical incidence (e.g., *Sekhon and Srivastava*, 1971) and in soil erosion studies (e.g., *Rosewell* 1986). In these and other applications it is generally accepted that there is a unique fall speed ascribed to drops of a given mass or diameter and that it equals the terminal speed with adjustment for pressure (e.g., *Beard* 1976). The terminal velocity measurements of *Gunn and Kinzer*, 1949) under calm laboratory conditions, and fits to their data (e.g., *Atlas et al.*, 1973; *Footo and du Toit*, 1969; *Beard and Pruppacher*, 1969) are still considered the standard against which measurements using more modern optical instruments in natural rain are compared ([Löffler-Mang and Joss, 2000](#); [Barthazy et al., 2004](#); [Schönhuber et al., 2008](#); [Testik and Rahman, 2016](#); [Yu et al., 2016](#)). More recently, the broadening and skewness of the fall speed distributions of a given size (3 mm) in one intense rain event were attributed to mixed-mode amplitude oscillations (*Thurai et al.*, 2013). Super- and sub-terminal fall speeds in intense rain shafts have been detected and attributed, respectively, to drop breakup fragments (sizes < 0.5 mm), and high wind/gusts (sizes 1-2 mm) (*Montero-Martinez et al.*, 2009; *Larsen et al.*, 2014; *Montero-Martinez and Garcia-Garcia*, 2016). Thus, there is some evidence that rain drops may not fall at their terminal velocity except under calm conditions and that the concept of a fall speed distribution for a drop of given mass (or, diameter) might need to be considered which is the topic of this paper. The implications are rather profound especially for numerical modeling of collision-coalescence and breakup processes which are important for shaping the drop size distribution.

The fall speeds and concentration of small drops (< 1 mm) in natural rain are difficult to measure accurately given the poor resolution (>170  $\mu\text{m}$ ) of most optical disdrometers and/or sensitivity issues. While cloud imaging probes (with high resolution 25-50  $\mu\text{m}$ ) on aircraft have been used for many years they generally cannot measure the fall speeds. A relatively new instrument, the Meteorological Particle Spectrometer (MPS) is a droplet imaging probe that was built by Droplet Measurements Technologies (DMT, Inc.) under contract from the US Weather Service specifically designed for drizzle as small as 50  $\mu\text{m}$  and rain drops up to 3 mm. This instrument in conjunction with a lower resolution 2D-Video Disdrometer (*Schoenhuber et al.*, 2008) is used in this paper to measure fall speed distributions in natural rain.

This paper briefly describes the instruments used, presents fall speed measurements from two sites under relatively low wind conditions, and one case from an unusual

tornadic supercell with high winds and gusts and ends with a brief discussion and summary of the results.

## 2 Instrumentation and Measurements

The principal instruments used in this study are the MPS and 3<sup>rd</sup> generation 2D-video disdrometer (2DVD), both located within a 2/3-scale Double Fence Intercomparison Reference (DFIR; *Rasmussen et al.*, 2012) wind shield. As reported in (*Notaros et al.*, 2016), the 2/3-scale DFIR was effective in reducing the ambient wind speeds by nearly a factor of 2-3 based on data from outside and inside the fence. The flow field in and around the DFIR has been simulated by (*Theriault et al.*, 2015) assuming steady ambient winds. They found that depending on the wind direction relative to the octagonal fence, weak vertical motions could be generated above the sensor areas. For 5 m/s speeds, the motions could range between -0.4 (down draft) to 0.2 m/s (up draft).

The instrument set-up was the same for the two sites (Greeley, Colorado and Huntsville, Alabama). Huntsville has a very different climate from Greeley, and its altitude is 212 m MSL as compared with 1.4 km MSL for Greeley. According to the Köppen–Trewartha climate classification system ([Trewartha and Horn, 1980](#)), this labels Greeley as a semiarid-type climate, whereas Huntsville is a humid subtropical-type climate ([Belda et al., 2014](#)).

The MPS is an optical array probe (OAP) that uses the technique introduced by *Knollenberg* (1970, 1976, 1980) and measures drop diameter in the range from 0.05-3.1 mm. A 64 element photo-diode array is illuminated with a 660 nm collimated laser beam. Droplets passing through the laser cast a shadow on the array and the decrease in light intensity on the diodes is monitored with the signal processing electronics. A two dimensional image is captured by recording the light level of each diode during the period that the array is shadowed. The fall velocity is derived using two methods. One uses the same approach as described by (*Montero-Martinez et al.*, 2009) where the fall velocity is calculated from the product of the true air speed clock and ratio of the image height -to-width. Note that “width” is the horizontal dimension parallel to the array and “height” is along the vertical. The second method computes the fall velocity from the maximum horizontal dimension (spherical drop shape assumption) divided by the amount of time that the image is on the array, a time measured with a 2 MHz clock. In order to be comparable to the results of (*Montero-Martinez et al.*, 2009), their approach is implemented here for sizes > 250  $\mu\text{m}$ . The fall velocity of smaller, slower moving droplets, is measured using the second technique.



The limitations and uncertainties associated with OAP measurements have been well documented (Korolev *et al.*, 1991; 1998; Baumgardner *et al.*, 2017). There are a number of potential artifacts that arise when making measurements with optical array probes (Baumgardner *et al.*, 2017): droplet breakup on the probe tips that form satellite droplets, multiple droplets imaged simultaneously, and out-of-focus drops whose images are usually larger than the actual drop (Korolev, 2007). The measured images have been analyzed to remove satellite droplets whose interarrival times are usually too short to be natural drops, multiple drops are detected by shape analysis and removed, and out-of-focus drops are detected and size corrected using the technique described by (Korolev 2007). The sizing and fall speed errors primarily depend on the digitization error ( $\pm 25 \mu\text{m}$ ). The fall speed accuracy according to the manufacturer (DMT) is  $<10\%$  for  $0.25 \text{ mm}$  and  $<1\%$  for sizes greater than  $1 \text{ mm}$ , limited primarily by the accuracy in droplet sizing.

The 3<sup>rd</sup> generation 2DVD is described in detail by (Schoenhuber *et al.*, 2007; 2008) and its accuracy of size and fall speed measurement has been well documented (e.g., Thurai *et al.*, 2007; 2009; Huang *et al.*, 2008; Bernauer *et al.*, 2015). Considering the horizontal pixel resolution of  $170 \mu\text{m}$  and other factors (such as “mis-matched” drops), the effective sizing range is  $D > 0.7 \text{ mm}$ . To clarify the “mis-matched” drop problem: it is very difficult to match a drop detected in the top light-beam plane of the 2DVD to the corresponding drop in the bottom plane for tiny drops resulting in erroneous fall speeds. The fall velocity accuracy is determined primarily by the accuracy of calibrating the distance between the two orthogonal light “sheets” or planes and is  $< 5\%$  for fall velocity  $<10 \text{ m s}^{-1}$ . In our application, we utilize the MPS for measurement of small drops with  $D < 1.2 \text{ mm}$ . The measurements from the MPS are compared with those from the 2DVD in the overlap region of  $D \approx 0.7\text{--}2.0 \text{ mm}$  to ensure consistency of observations. The only fall velocity threshold used for the 2DVD is the lower limit set at  $0.5 \text{ m s}^{-1}$  in accordance with the manufacturer guidelines for rain measurements.

## 2.1 Fall Speeds from Greeley, Colorado

We first consider a long duration (around 20 h) rain episode on 17 April 2015 which consisted of a wide variety of rain types/rates (mostly light stratiform  $< 8 \text{ mm h}^{-1}$ ) as described in Table 2 of (Thurai *et al.*, 2017). Two wind sensors at a height of  $1 \text{ m}$  were available to measure the winds outside and inside the DFIR. Average wind speeds were, respectively,  $< 1.5 \text{ m s}^{-1}$  inside the DFIR and  $< 4 \text{ m s}^{-1}$  outside with light gusts. These wind sensors were specific to the winter experiment described in (Notaros *et al.*, 2016) and were unavailable for the rain measurement campaign after May 2015.

Figure 1(a) shows the fall speeds versus  $D$  from the 2DVD (shown as contoured frequency of occurrence), along with mean and  $\pm 1\sigma$  standard deviation from the MPS. Also shown is the (Foote and du Toit 1969) (henceforth FT fit) to the terminal fall speed

measurements of (Gunn and Kinzer, 1949) at sea level and after applying altitude corrections (Beard, 1976) for the elevation of 1.4 km MSL for Greeley. Panels (b,c) shows the histogram of fall speeds for diameter intervals ( $0.5\pm 0.1$ ) and ( $1\pm 0.1$  mm), and ( $0.7\pm 0.1$ ) and ( $1.5\pm 0.1$  mm), respectively. Panel (a) demonstrates the excellent “visual” agreement between the two instruments in the overlap size range (0.7-2 mm) which is quantified in Table 1. However, the altitude-adjusted FT fit is slightly higher than the measured values as shown in Table 1. Notable in Fig. 1a is the remarkable agreement in mean fall speeds between the FT fit and the MPS for  $D < 0.5$  mm down to near the lower limit of the instrument (0.1 mm). Few measurements have been reported of fall speeds in this size range.

Table 1: Expected fall velocities for various diameter intervals (bin width of 0.2 mm) from (Foote and du Toit, 1969) with altitude adjustment, and the measured mean fall velocities with  $\pm 1\sigma$  (standard deviation)

| <b>D range (mm)<br/>(Greeley)</b>    | <b>Expected (<math>m\ s^{-1}</math>)<br/>at 1.4 km</b> | <b>MPS (<math>m\ s^{-1}</math>)<br/>Mean <math>\pm 1\sigma</math></b> | <b>2DVD (<math>m\ s^{-1}</math>)<br/>Mean <math>\pm 1\sigma</math></b> |
|--------------------------------------|--------------------------------------------------------|-----------------------------------------------------------------------|------------------------------------------------------------------------|
| 0.6 to 0.8                           | 2.6 to 3.5                                             | $2.6 \pm 0.6$                                                         | $2.5 \pm 0.8$                                                          |
| 0.8 to 1.0                           | 3.5 to 4.3                                             | $3.4 \pm 0.6$                                                         | $3.3 \pm 0.9$                                                          |
| 1.0 to 1.2                           | 4.3 to 4.9                                             | $4.2 \pm 0.6$                                                         | $4.1 \pm 0.9$                                                          |
| 1.2 to 1.4                           | 4.9 to 5.5                                             | $4.9 \pm 0.5$                                                         | $5.0 \pm 0.8$                                                          |
| 1.4 to 1.6                           | 5.5 to 6.1                                             | $5.6 \pm 0.5$                                                         | $5.7 \pm 0.7$                                                          |
| 1.6 to 1.8                           | 6.1 to 6.6                                             | $6.1 \pm 0.4$                                                         | $6.2 \pm 0.7$                                                          |
| 1.8 to 2.0                           | 6.6 to 7.0                                             | $6.7 \pm 0.4$                                                         | $6.6 \pm 0.8$                                                          |
|                                      |                                                        |                                                                       |                                                                        |
| <b>D range (mm)<br/>(Huntsville)</b> | <b>Expected (m/s)<br/>at 0 km</b>                      | <b>MPS (m/s)<br/>Mean <math>\pm</math> Std_dev</b>                    | <b>2DVD (m/s)<br/>Mean <math>\pm</math> Std. dev</b>                   |
| 0.6 to 0.8                           | 2.5 to 3.3                                             | $2.6 \pm 0.6$                                                         | $2.5 \pm 0.7$                                                          |
| 0.8 to 1.0                           | 3.3 to 4.0                                             | $3.4 \pm 0.5$                                                         | $3.3 \pm 0.7$                                                          |
| 1.0 to 1.2                           | 4.0 to 4.6                                             | $4.2 \pm 0.6$                                                         | $4.1 \pm 0.8$                                                          |
| 1.2 to 1.4                           | 4.6 to 5.2                                             | $4.9 \pm 0.4$                                                         | $4.9 \pm 0.7$                                                          |
| 1.4 to 1.6                           | 5.2 to 5.7                                             | $5.4 \pm 0.4$                                                         | $5.4 \pm 0.6$                                                          |
| 1.6 to 1.8                           | 5.7 to 6.1                                             | $6.0 \pm 0.3$                                                         | $5.8 \pm 0.6$                                                          |
| 1.8 to 2.0                           | 6.1 to 6.5                                             | $6.5 \pm 0.4$                                                         | $6.3 \pm 0.5$                                                          |

The histograms in Fig. 1(b,e) show good agreement between 2DVD and MPS for 1 mm and 1.5 mm drop sizes, respectively, with respect to the mode, symmetry, spectral width and lack of skewness in the distributions. For the 1 mm size histogram, the mean is  $3.8\ m\ s^{-1}$  while the spectral width or standard deviation from MPS data is  $0.6\ m\ s^{-1}$ . The corresponding coefficient of variation (ratio of standard deviation to mean) is 15.7%. The finite bin width used (0.9-1.1 mm) causes a corresponding fall speed “spread” of around  $0.6\ m\ s^{-1}$  which is clearly a significant contributor to the measured coefficient of

variation. Similar comments apply to the fall speed histogram for the 1.5 mm size shown in Fig. 1c. The definition of sub- or super-terminal fall speeds by (Montero-Martinez et al., 2009) is based on fall speeds that are, respectively, less than 0.7 times the mean value or greater than 1.3 times the mean value (i.e., exceeding 30% threshold on either side of the mean terminal fall speed). From examining the 1 mm size fall speed histogram there is negligible evidence of occurrences with fall speeds  $< 2.66 \text{ m s}^{-1}$  (sub) or  $> 4.94 \text{ m s}^{-1}$  (super). Similar comment also applies for the 1.5 mm size based on the corresponding histogram.

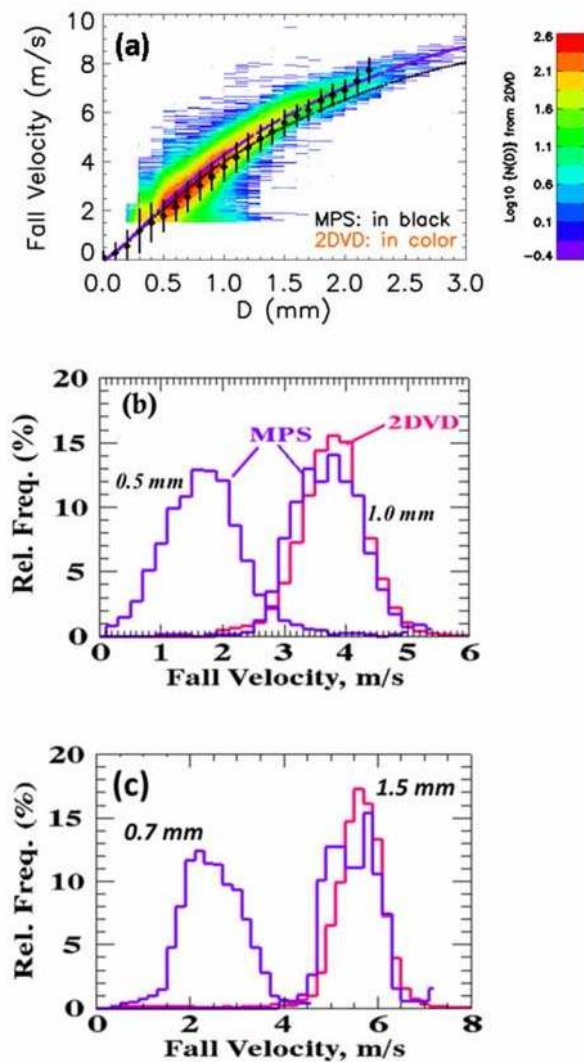

Figure 1. (a) Fall velocity versus diameter ( $D$ ). The contoured frequency of occurrence from 2DVD data is shown in color (log scale). The mean fall velocity and  $\pm 1\sigma$  standard deviation bars are from MPS. The dark dashed line is from the fit to the laboratory data of Gunn and Kinzer (1949) and the purple line is the same except corrected for the altitude of Greeley, CO (1.4 km

MSL). (b) Relative frequency histograms of fall velocity for the  $0.5\pm 0.1$  mm and  $1\pm 0.1$  mm bins. (c) as in (b) except for the  $0.7\pm 0.1$  mm and  $1.5\pm 0.1$  mm bins.

The histogram from MPS for the 0.5 mm sizes shows positive skewness with mean of  $1.8 \text{ m s}^{-1}$ , spectral width of  $0.65 \text{ m s}^{-1}$  and corresponding coefficient of variation nearly doubling to 35% (relative to the 1 mm size histogram). The finite bin width (0.4-0.6 mm) causes a corresponding fall speed “spread” of  $0.4 \text{ m s}^{-1}$  which contributes to the measured coefficient of variation. Nevertheless, it is not possible to rule out the low frequency of occurrence of sub- or super-terminal fall speeds, respectively, less than  $1.26 \text{ m s}^{-1}$  or exceeding  $2.34 \text{ m s}^{-1}$  based on our data. Examination of the MPS-based fall speed histogram for the 0.7 mm size indicates negative skewness. As with the 0.5 mm drops it is not possible to rule out the occurrences of fall speeds  $< 1.8 \text{ m s}^{-1}$  or  $> 3.4 \text{ m s}^{-1}$ , i.e., sub- or super-terminal fall speeds.

## 2.2 Fall Speeds from Huntsville, Alabama

The first Huntsville event occurred on 11 April 2016 and consisted of precipitation associated with the mesoscale vortex of a developing squall line that moved across northern Alabama between 1800 and 2300 UTC and produced over 25 mm of rainfall in the Huntsville area. Figure 2(a) shows the ambient 10-m height wind speeds (3 s and 5-min averaged) recorded at the site. Maximum speeds were less than  $5 \text{ m s}^{-1}$  and wind gusts were light. As no direct *in situ* measurement of turbulence was available we use the approach by (Garrett and Yuter, 2014) who estimate the difference between the maximum wind speed, or gust, that was sampled every 3 s, and the average wind speed derived from successive 5 min intervals. The estimated turbulent intensity is proportional to  $E = (\text{Gusts} - \text{AverageWind})^2/2$ . Figure 2(b) shows the  $E$  values which were small (maximum  $E < 0.4 \text{ m}^2 \text{ s}^{-2}$ ) and indicative of low turbulence. Also, shown in Fig. 2(b) is the 2DVD-based time series of rainfall rate (R) averaged over 3 mins; the maximum R is around  $10 \text{ mm h}^{-1}$ .

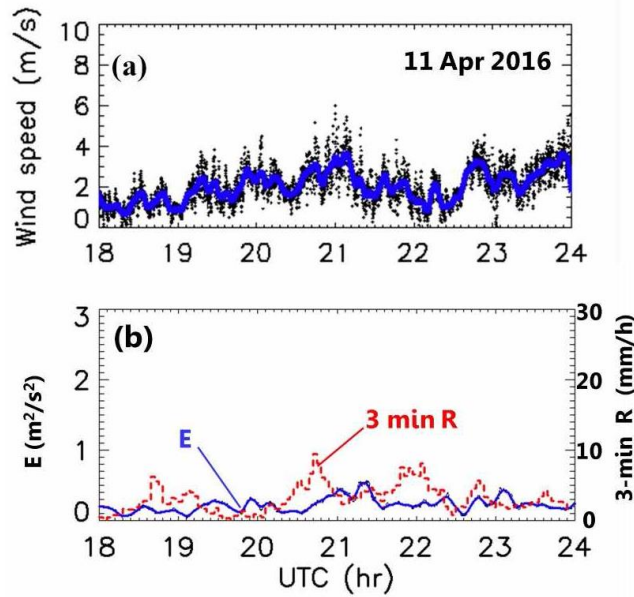

*Figure 2:* (a) 3-s raw and 5-min averaged wind speeds at 10-m height. (b) turbulent intensity estimates  $E$ , and 3-min averaged  $R$ .

Figure 3(a) shows the fall velocity versus  $D$  comparison between the two instruments while panels (b,c) show the histograms for the 0.5 and 1 mm, and 0.7 and 1.5 mm sizes, respectively. Similar to the Greeley event, the mean fall speed agreement between both instruments in the overlap region is excellent (see Table 1) and consistent with the FT fit to the Gunn-Kinzer laboratory data. As in Fig. 1(a), the MPS data in Fig. 3(a) is in excellent agreement with FT fit for sizes  $< 0.5$  mm.

The 0.5 and 1 mm histogram shapes in Fig. 3(b) are quite similar to the Greeley case shown in Fig. 1(b). The mean and standard deviations from the MPS data for the 0.5 and 1 mm bins are, respectively,  $[2 \pm 0.62]$  and  $[3.88 \pm 0.44]$   $\text{m s}^{-1}$ . The values for the 0.7 and 1.5 mm bins are, respectively,  $[2.6 \pm 0.6]$  and  $[5.4 \pm 0.4]$   $\text{m s}^{-1}$ . There is negligible evidence of sub- or super-terminal fall speed occurrences based on the 1 and 1.5 mm histograms. The comments made earlier with respect to Fig. 1(b,c) of the Greeley event for the 0.5 and 0.7 mm histograms are also applicable here, i.e., we cannot rule out the occasional occurrences of sub- or super-terminal fall speeds based on our data.

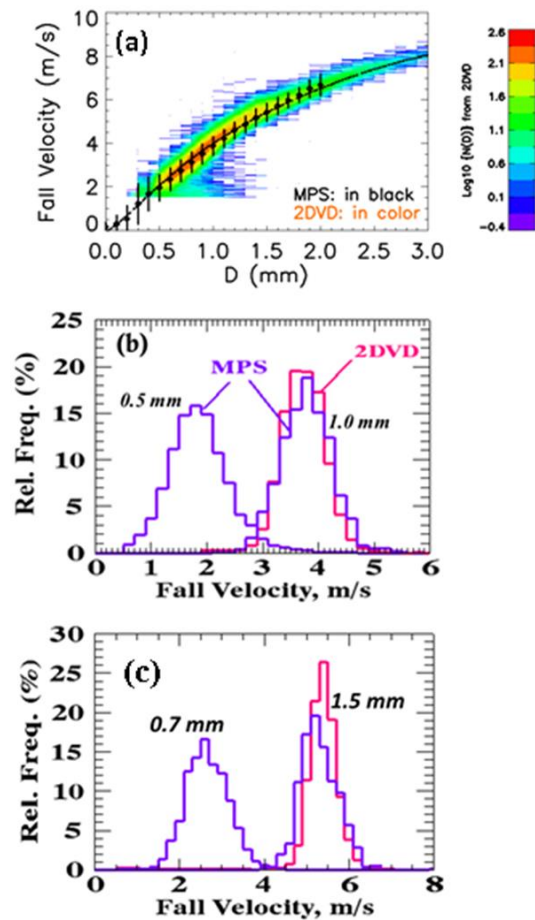

Figure 3. (a) as in Fig. 1(a) except for 11 April 2016 event. The dashed line is fit to Gunn-Kinzer at sea level. (b,c) as in Fig. 1(b,c) except for 11 April 2016 event.

The second case considered is from 30 November 2016 wherein a supercell passed over the instrumented site from 0300-0330 UTC producing about 15 mins later a long-lived EF-2 tornado. Strong winds were recorded at the site with 5-min averaged speeds reaching 10-12 m s<sup>-1</sup> between 0320-0330 and E values in the range to 7-8 m<sup>2</sup> s<sup>-2</sup> indicating strong turbulence (Fig. 4a,b). The rain rates peaked at 70 mm h<sup>-1</sup> during this time (Fig. 4b). About 3 h later several squall-line type storm cells passed over the site from 0700-0900 UTC again with strong winds but considerably lower E values 2-4 m<sup>2</sup> s<sup>-2</sup> and maximum R of 80 mm h<sup>-1</sup>. After 1000 UTC the E values were much smaller (< 0.5 m<sup>2</sup> s<sup>-2</sup>) indicating calm conditions. The peak R is also smaller at 30 mm h<sup>-1</sup> at 1000 UTC.

Figure 4 panels (c), (d) and (e) show the mean and  $\pm 1\sigma$  of the fall speeds from the 2DVD for the 1.3, 2 and 3 mm drop sizes, respectively. The MPS data are not shown



here since during this event it was located outside the DFIR on its turntable and we did not want to confuse the wind-effects between the two instruments. It is clear from Fig. 4(c) that during the supercell passage (0300-0330 UTC) the mean fall speed for 1.3 mm drops decreases (from 5 to 3.5 m s<sup>-1</sup>) and the standard deviation increases (from 0.5 to 1.5 m s<sup>-1</sup>). The histogram shapes also show increasing negative skewness (not shown). The same trend can be seen for the subsequent squall-line rain cell passage from 0700-0900 UTC. Similar trends are noted in panels (d) and and less so in panel (e).

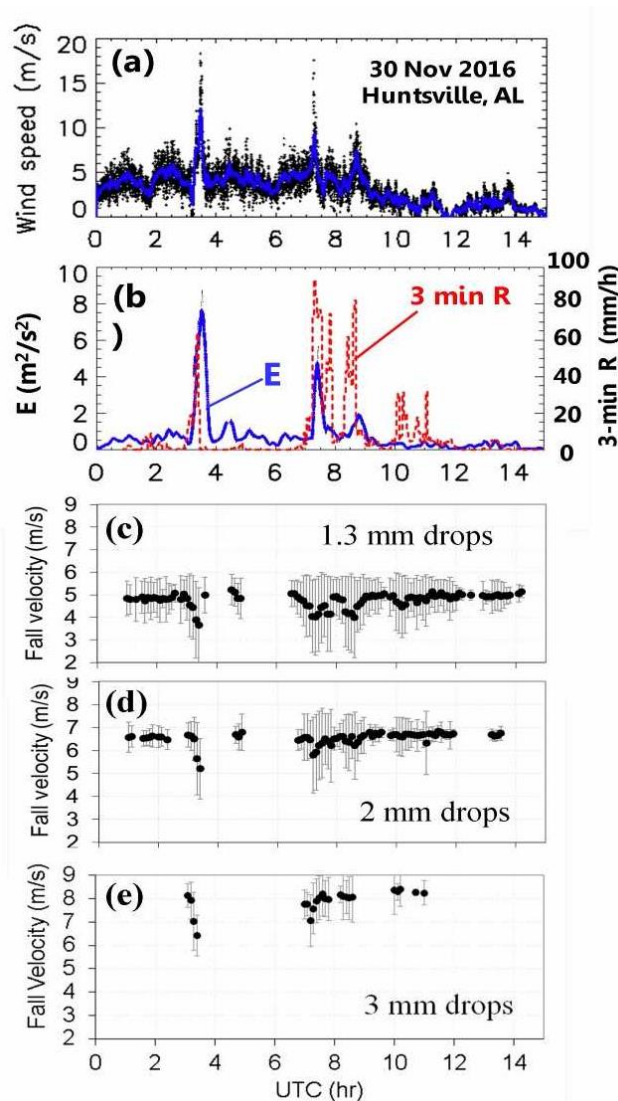

Figure 4. (a) as in Fig. 2(a) except for 30 Nov 2016 event. (b) as in Fig. 2(b). (c) mean and  $\pm 1\sigma$  standard deviation of fall speeds from 2DVD for  $1.3 \pm 0.1$  mm sizes. (d,e) as in (c) except for  $2 \pm 0.1$  and  $3 \pm 0.1$  mm sizes, respectively.

To expand on this observed correlation, Fig. 5 shows scatterplots of the mean fall speed and standard deviation versus  $E$  for the 1.3 mm drops (panels a,b), while panels (c,d) and (e,f) show the same but for the 2 and 3 mm drops, respectively. The mean fall speed decreases with increasing  $E$  nearly linearly for  $E > 1 \text{ m}^2 \text{ s}^{-2}$  but less so for the 3 mm size drops (Stout et al., 1995). This decrease relative to *Gunn-Kinzer* terminal fall speeds is termed as “sub-terminal” and our data is in general agreement with (Montero-Martínez and García-García 2016) who found an increase in the numbers of sub-terminal drops with sizes between 1-2 mm under windy conditions using a 2D-Precipitation probe with resolution of 200  $\mu\text{m}$  (similar to 2DVD) but without a wind fence. The standard deviation of fall speeds ( $\sigma_f$ ) versus  $E$  is shown in panels 5 (b,d,f). When  $E > 1 \text{ m}^2 \text{ s}^{-2}$ , the  $\sigma_f$  is nearly constant at  $1.5 \text{ m s}^{-1}$  for both 1.3 and 2 mm drop sizes and constant at  $1 \text{ m s}^{-1}$  for the 3 mm size. For  $E < 1$ , the  $\sigma_f$  is more variable and essentially uncorrelated with  $E$ . From the discussion related to Fig. 1(b,c) and 3(b,c),  $\sigma_f$  values exceeding approximately  $0.5 \text{ m s}^{-1}$  can be attributed to physical, not instrumental or finite bin width effects (see, also, Table 1). Thus, the fall speed distributions are considerably broadened when  $E > 1 \text{ m}^2 \text{ s}^{-2}$  due to increasing turbulence levels which is again consistent with the findings of (Montero-Martínez and García-García, 2016) as well as those of (Garrett and Yuter, 2014). The latter observations, however, were of graupel fall speeds in winter precipitation using a multi-angle snowflake camera (Garrett et al., 2012).



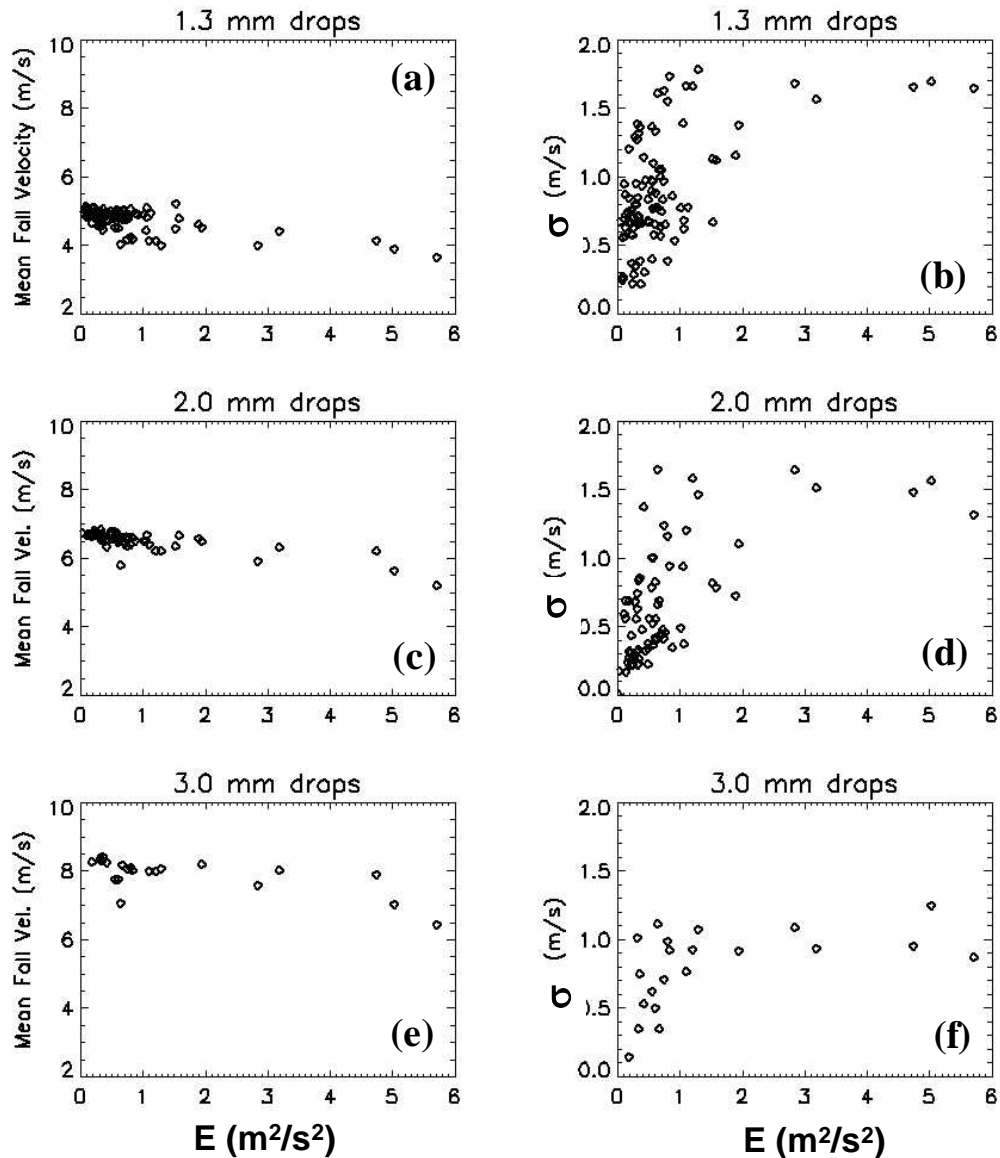

*Figure 5.* (a,b) mean fall speed and standard deviation, respectively, versus  $E$  for 1.3 mm sizes. (c,d) same but for 2 mm sizes. (e,f) same but for 3 mm.

### 3 Discussion and Conclusions

We have reported on raindrop fall speed distributions using a high resolution (50  $\mu\text{m}$ ) droplet spectrometer (MPS) collocated with moderate resolution (170  $\mu\text{m}$ ) 2DVD (with both instruments inside a DFIR wind shield) to cover the entire size range (from 0.1 mm onwards) expected in natural rain. Turbulence intensity ( $E$ ) was derived from wind/gust

data at 10-m height following (Garrett and Yuter, 2014). For low turbulent intensities ( $E < 0.4 \text{ m}^2 \text{ s}^{-2}$ ), in the overlap region of the two instruments (0.7-2 mm), the mean fall speeds were in excellent agreement with each other for both the Greeley, CO and Huntsville, AL sites giving high confidence in the quality of the measurements. For  $D < 0.5$  mm and down to 0.1 mm, the mean fall speeds from MPS from both sites were in remarkable agreement with the (Foote and du Toit, 1969) fit to the laboratory data of (Gunn and Kinzer, 1949). In the overlap region, the mean fall speeds from the two instruments were in excellent agreement with the FT fit for the Huntsville site (no altitude adjustment required) and good agreement for the Greeley site (after adjustment for altitude of 1.4 km). For  $D > 2$  mm, the mean fall speeds from 2DVD were in excellent agreement with the FT fit at both sites.

Our histograms of fall speeds for 1 and 1.5 mm sizes under low turbulence intensity conditions ( $E < 0.4 \text{ m}^2 \text{ s}^{-2}$ ) from both MPS and 2DVD were in good agreement and did not show any evidence of either sub- or super-terminal speeds, rather the histograms were symmetric with mean close to the Gunn-Kinzer terminal velocity with no significant broadening over that ascribed to instrument and/or finite bin width effects. (Note: sub-terminal implies fall speeds  $< 0.7$  times the terminal fall speed whereas super-terminal implies  $> 1.3$  times terminal value; Montero-Martinez et al., 2009). However, for the 0.5 and 0.7 mm sizes, from the histogram of fall speeds using the MPS under the same conditions occasional occurrences of both sub- and super-terminal fall speeds, after accounting for instrumental and finite bin width effects, cannot be ruled out.

The only comparable earlier study is by (Montero-Martinez et al., 2009) who used collocated 2D-cloud and precipitation probes (2D-C, 2D-P) but restricted their data to calm wind conditions. Their main conclusion was that the distribution of the ratio of the measured fall speed to the terminal fall speed for 0.44 mm size, while having a mode at  $1 \text{ m s}^{-1}$  was strongly positively skewed with tails extending to  $5 \text{ m s}^{-1}$  especially at high rain rates. In our data for the 0.5 and 0.7 mm sizes shown in Fig. 1(b,c) and 3(b,c), no such strong positive skewness was observed in the fall speed histograms, and the corresponding ratio of MPS-measured fall speeds to terminal values does not exceed 1.5 to 2.

Another study by Larsen et al., (2014) appears to confirm the ubiquitous existence of super-terminal fall speeds for sizes  $< 1$  mm using different instruments one of which was a 2DVD similar to the one used in this study. However, it is well-known that “mismatched” drops cause erroneous fall speed estimates from 2DVD for drops  $< 0.5$  mm (Schoenhuber et al., 2008; Appendix in Huang et al., 2010; Bernauer et al., 2015). It is not clear if (Larsen et al., 2014) accounted for this problem in their analysis. In addition, their 2DVD was not located within a DFIR-like wind shield.

In a later study using only the 2D-P probe, (Montero-Martinez and Garcia-Garcia, 2016) found sub-terminal fall speeds and broadened distributions under windy conditions for 1-2 mm sizes in general agreement with our results using the 2DVD. Stout *et al.*, (1995) simulated the motion of drops **subject to non-linear drag** in isotropic turbulence and determined that there would be a significant reduction of the average drop settling velocity (relative to terminal velocity) of greater than 35% for drops around 2 mm size when the ratio of *rms* velocity fluctuations (due to turbulence) relative to drop terminal velocity is around 0.8. Whereas we did not have a direct measure of the *rms* velocity fluctuations, the proxy for turbulence intensity ( $E$ ) related to wind gusts during supercell passage (very large  $E$  around  $7 \text{ m}^2 \text{ s}^{-2}$ ) **and two squall-line passages (moderate  $E$  between  $2\text{-}5 \text{ m}^2 \text{ s}^{-2}$ )** clearly showed a significant reduction in mean fall speeds of **25-30% relative to terminal speed for 1.3 and 2 mm sizes (and less so for 3 mm drops)**, with significant broadening of the fall speed distributions relative to calm conditions by **nearly a factor of 1.5 to 2.**

While our dataset is limited to three events they cover a wide range of rain rates, wind conditions and two different climatologies. **One caveat is that the response of the DFIR wind shield to ambient winds in terms of producing subtle vertical air motions near the sensor area is yet to be evaluated as future work.** Analysis of further events with direct measurement of turbulent intensity, **for example using a 3D-sonic anemometer at the height of the sensor,** would be needed to generalize our findings.

## Data Availability

Data used in this paper can be accessed from:

[ftp://lab.chill.colostate.edu/pub/kennedy/merhala/Bringi\\_et\\_al\\_2017\\_GRL\\_datasets/](ftp://lab.chill.colostate.edu/pub/kennedy/merhala/Bringi_et_al_2017_GRL_datasets/)

## Competing interests

VNB and MT declare they have no conflict of interest. DB is employed by Droplet Measurements Technologies, Inc. (Longmont, Colorado, USA) who manufacture the Meteorological Particle Spectrometer used in this study.

## Acknowledgements

Two of the authors (VNB and MT) acknowledge support from the U.S. National Science Foundation via grant AGS-1431127. The assistance of Dr. Patrick Gatlin of NASA/MSFC is gratefully acknowledged. Prof. Kevin Knupp and Mr. Carter Hulseay of the University of Alabama in Huntsville processed the wind data.



## References

- Atlas, D., R. C. Srivastava, and R. S. Sekhon (1973). Doppler radar characteristics of precipitation at vertical incidence, *Rev. Geophys.*, 11, 1–35, doi:<https://doi.org/10.1029/RG011i001p00001>
- Barthazy, E., S. Göke, R. Schefold, and D. Högl (2004), An optical array instrument for shape and fall velocity measurements of hydrometeors, *J. Atmos. Oceanic Technol.*, 21, 1400–1416, doi:[https://doi.org/10.1175/1520-0426\(2004\)021<1400:AOAIFS>2.0.CO;2](https://doi.org/10.1175/1520-0426(2004)021<1400:AOAIFS>2.0.CO;2).
- Baumgardner, D., S. Abel, D. Axisa, R. Cotton, J. Crosier, P. Field, C. Gurganus, A. Heymsfield, A. Korolev, M. Krämer, P. Lawson, G. McFarquhar, J. Z Ulanowski, J. Shik Um, 2016: Chapter 9: Cloud Ice Properties - In Situ Measurement Challenges, *AMS Monograph on Ice Formation and Evolution in Clouds and Precipitation: Measurement and Modeling Challenges*, Eds. D. Baumgardner, G. McFarquhar, A. Heymsfield, Boston, MA.
- Beard, K. V. (1976), Terminal velocity and shape of cloud and precipitation drops aloft, *J. Atmos. Sci.*, 33, 851–864, doi:[https://doi.org/10.1175/1520-0469\(1976\)033<0851:TVASOC>2.0.CO;2](https://doi.org/10.1175/1520-0469(1976)033<0851:TVASOC>2.0.CO;2)
- Beard, K. V., and H. R. Pruppacher (1969), A determination of the terminal velocity and drag of small water drops by means of a wind tunnel, *J. Atmos. Sci.*, 26, 1066–1072, doi: [https://doi.org/10.1175/1520-0469\(1969\)026<1066:ADOTTV>2.0.CO;2](https://doi.org/10.1175/1520-0469(1969)026<1066:ADOTTV>2.0.CO;2).
- Belda, M., E. Holtanová, T. Halenka, and J. Kalvová (2014), Climate classification revisited: From Köppen to Trewartha. *Climate Res.*, 59, 1–13, doi:<https://doi.org/10.3354/cr01204>.
- Bernauer, F., K. Hürkamp, W. Rühm, and J. Tschiersch (2015), On the consistency of 2-D video disdrometers in measuring microphysical parameters of solid precipitation, *Atmos. Meas. Tech.*, 8, 3251–3261, doi: <https://doi.org/10.5194/amt-8-3251-2015>
- Foote, G.B. and P.S. Du Toit (1969), Terminal Velocity of Raindrops Aloft. *J. Appl. Meteor.*, 8, 249–253, [https://doi.org/10.1175/1520-0450\(1969\)008<0249:TVORA>2.0.CO;2](https://doi.org/10.1175/1520-0450(1969)008<0249:TVORA>2.0.CO;2)
- Garrett, T. J., and S. E. Yuter (2014), Observed influence of riming, temperature, and turbulence on the fallspeed of solid precipitation, *Geophys. Res. Lett.*, 41, 6515–6522, doi:10.1002/2014GL061016.
- Garrett, T. J., Fallgatter, C., Shkurko, K., and Howlett, D. (2012), Fall speed measurement and high-resolution multi-angle photography of hydrometeors in free fall, *Atmos. Meas. Tech.*, 5, 2625–2633, doi:10.5194/amt-5-2625-2012
- Gunn, R. and G.D. Kinzer (1949), The terminal velocity of fall for water droplets in stagnant air, *J. Meteor.*, 6, 243–248, [https://doi.org/10.1175/1520-0469\(1949\)006<0243:TTVOFF>2.0.CO;2](https://doi.org/10.1175/1520-0469(1949)006<0243:TTVOFF>2.0.CO;2)

- Huang, G., V.N. Brinji, and M. Thurai (2008), Orientation Angle Distributions of Drops after an 80-m Fall Using a 2D Video Disdrometer, *J. Atmos. Oceanic Technol.*, 25,1717–1723, <https://doi.org/10.1175/2008JTECHA1075.1>
- Huang, G., V.N. Brinji, R. Cifelli, D. Hudak, and W.A. Petersen (2010), A Methodology to Derive Radar Reflectivity–Liquid Equivalent Snow Rate Relations Using C-Band Radar and a 2D Video Disdrometer, *J. Atmos. Oceanic Technol.*, 27, 637–651, <https://doi.org/10.1175/2009JTECHA1284.1>
- Joe, P., and R. List (1987), Testing and performance of two-dimensional optical array spectrometer with grey scale, *J. Atmos. Oceanic Technol.*, 4, 139-150, [https://doi.org/10.1175/1520-0426\(1987\)004<0139:TAPOTD>2.0.CO;2](https://doi.org/10.1175/1520-0426(1987)004<0139:TAPOTD>2.0.CO;2)
- Knollenberg, R. (1970), The Optical Array: An alternative to scattering or extinction for airborne particle size determination, *J. Appl. Meteorol.*, 9, 86–103, [doi:https://doi.org/10.1175/1520-0450\(1970\)009<0086:TOAAAT>2.0.CO;2](https://doi.org/10.1175/1520-0450(1970)009<0086:TOAAAT>2.0.CO;2).
- Knollenberg, R. (1976), Three new instruments for cloud physics measurements: The 2–D spectrometer probe, the forward scattering spectrometer probe and the active scattering aerosol spectrometer, in International Conference on Cloud Physics, American Meteorological Society, 554–561,.
- Knollenberg, R. (1981), Clouds, Their Formation, Optical Properties and Effects, chap. Techniques for probing cloud microstructure, Academic Press, edited by P.V. Hobbs and A. Deepak. 495 pp
- Korolev, A. V., Kuznetsov, S. V., Makarov, Y. E., and Novikov, V. S. (1991), Evaluation of Measurements of Particle Size and Sample Area from Optical Array Probes, *J. Atmos. Oceanic Tech.*, 8, 514–522, [https://doi.org/10.1175/1520-0426\(1991\)008<0514:EOMOPS>2.0.CO;2](https://doi.org/10.1175/1520-0426(1991)008<0514:EOMOPS>2.0.CO;2)
- Korolev, A. V., J. W. Strapp, and G. A. Isaac (1998), Evaluation of the Accuracy of PMS Optical Array Probes, *Journal of Atmospheric and Oceanic Technology*, 15, 708–720, [https://doi.org/10.1175/1520-0426\(1998\)015<0708:EOTAOP>2.0.CO;2](https://doi.org/10.1175/1520-0426(1998)015<0708:EOTAOP>2.0.CO;2)
- Korolev, A. V. (2007), Reconstruction of the Sizes of Spherical Particles from Their Shadow Images. Part I: Theoretical Considerations, *Journal of Atmospheric and Oceanic Technology*, 24, 376–389, <https://doi.org/10.1175/JTECH1980.1>
- Larsen, M.L., A.B. Kostinski, and A.R. Jameson (2014), Further evidence for super terminal drops, *Geophysical Research Letters* , 41, 2014GL061397.
- List, R., N.R. Donaldson, and R.E. Stewart (1987), Temporal Evolution of Drop Spectra to Collisional Equilibrium in Steady and Pulsating Rain, *J. Atmos. Sci.*, 44, 362–372, [https://doi.org/10.1175/1520-0469\(1987\)044<0362:TEODST>2.0.CO;2](https://doi.org/10.1175/1520-0469(1987)044<0362:TEODST>2.0.CO;2)

- Löffler-Mang, M. and J. Joss (2000), An Optical Disdrometer for Measuring Size and Velocity of Hydrometeors, *J. Atmos. Oceanic Technol.*, 17, 130–139, [https://doi.org/10.1175/1520-0426\(2000\)017<0130:AODFMS>2.0.CO;2](https://doi.org/10.1175/1520-0426(2000)017<0130:AODFMS>2.0.CO;2)
- Montero-Martinez, G. and F. Garcia-Garcia (2016), On the behavior of raindrop fall speed due to wind, *Quarterly Journal of the Royal Meteorological Society*, 142, 2794, DOI: 10.1002/qj.2794.
- Montero-Martinez, G., A. B. Kostinski, R. A. Shaw, and F. Garcia-Garcia (2009), Do all raindrops fall at terminal speed?, *Geophysical Research Letters*, 36, 246 L11818, doi:10.1029/2008GL037111.
- Notaroš, B., V. N. Bringi, C. Kleinkort, P. Kennedy, G-J Huang, M. Thurai, A. J. Newman, W. Bang and G. Lee (2016), Accurate Characterization of Winter Precipitation Using Multi-Angle Snowflake Camera, Visual Hull, Advanced Scattering Methods and Polarimetric Radar, *Atmosphere*, 7(6), 81; doi:10.3390/atmos7060081
- Rasmussen, R., B. Baker, J. Kochendorfer, T. Meyers, S. Landolt, A.P. Fischer, J. Black, J.M. Thériault, P. Kucera, D. Gochis, C. Smith, R. Nitu, M. Hall, K. Ikeda, and E. Gutmann (2012). How Well Are We Measuring Snow: The NOAA/FAA/NCAR Winter Precipitation Test Bed, *Bull. Amer. Meteor. Soc.*, 93, 811–829, <https://doi.org/10.1175/BAMS-D-11-00052.1>
- Rosewell, C.J. (1986), Rainfall Kinetic Energy in Eastern Australia, *J. Climate Appl. Meteor.*, 25, 1695–1701, [https://doi.org/10.1175/1520-0450\(1986\)025<1695:RKEIEA>2.0.CO;2](https://doi.org/10.1175/1520-0450(1986)025<1695:RKEIEA>2.0.CO;2)
- Schönhuber, M., Günter Lammer, Randeu W.L. (2007), *Advances in Geosciences*, 10, pp. 85-90, 2007, <https://doi.org/10.5194/adgeo-10-85-2007>.
- Schönhuber, M., G. Lammar, and W. L. Randeu (2008), “The 2D-video-distrometer”, Chapter 1 in “Precipitation: Advances in Measurement, Estimation and Prediction”, S. C. Michaelides, Ed., Springer, 3–31.
- Sekhon, R.S. and R.C. Srivastava (1971), Doppler Radar Observations of Drop-Size Distributions in a Thunderstorm, *J. Atmos. Sci.*, 28, 983–994, [https://doi.org/10.1175/1520-0469\(1971\)028<0983:DROODS>2.0.CO;2](https://doi.org/10.1175/1520-0469(1971)028<0983:DROODS>2.0.CO;2)
- Stout, J.E., S.P. Arya, and E.L. Genikhovich (1995). The Effect of Nonlinear Drag on the Motion and Settling Velocity of Heavy Particles, *J. Atmos. Sci.*, 52, 3836–3848, [https://doi.org/10.1175/1520-0469\(1995\)052<3836:TEONDO>2.0.CO;2](https://doi.org/10.1175/1520-0469(1995)052<3836:TEONDO>2.0.CO;2)
- Testik, F.Y. and M.K. Rahman (2016), High-Speed Optical Disdrometer for Rainfall Microphysical Observations, *J. Atmos. Oceanic Technol.*, 33, 231–243, <https://doi.org/10.1175/JTECH-D-15-0098.1>
- Thériault, J.M., R. Rasmussen, E. Petro, J. Trépanier, M. Colli, and L.G. Lanza (2015), Impact of Wind Direction, Wind Speed, and Particle Characteristics on the

Collection Efficiency of the Double Fence Intercomparison Reference, *J. Appl. Meteor. Climatol.*, 54, 1918–1930, <https://doi.org/10.1175/JAMC-D-15-0034.1>

Thurai, M. and V. N. Bringi (2005), Drop axis ratios from a 2D video disdrometer, *J. Atmos. Oceanic Technol.*, 22, 966–978, <https://doi.org/10.1175/JTECH1767.1>

M. Thurai, V. N. Bringi, M. Szakáll, S. K. Mitra, K. V. Beard, and S. Borrmann (2009), Drop Shapes and Axis Ratio Distributions: Comparison between 2D Video Disdrometer and Wind-Tunnel Measurements, *Journal of Atmospheric and Oceanic Technology*, 26 (7), 1427–1432, <https://doi.org/10.1175/2009JTECHA1244.1>

Thurai, M., V. N. Bringi, W. A. Petersen, P. N. Gatlin (2013), Drop shapes and fall speeds in rain: two contrasting examples, *J. Appl. Meteor. Climatol.*, 52, 2567–2581, <https://doi.org/10.1175/JAMC-D-12-085.1>

Thurai, M., P. Gatlin, V. N. Bringi, W. Petersen, P. Kennedy, B. Notaroš, and L. Carey (2017), Toward completing the raindrops size spectrum: Case studies involving 2D-video disdrometer, droplet spectrometer, and polarimetric radar measurements, *J. Appl. Meteor. Climatol.*, 56, 877–896, <https://doi.org/10.1175/JAMC-D-16-0304.1>

Trewartha, G. T., and L. H. Horn (1980), *Introduction to Climate*, 5th ed. McGraw Hill, 416 pp.

Yu, C.-K., Hsieh, P.-R., Yuter, S. E., Cheng, L.-W., Tsai, C.-L., Lin, C.-Y., and Chen, Y.: Measuring droplet fall speed with a high-speed camera: indoor accuracy and potential outdoor applications, *Atmos. Meas. Tech.*, 9, 1755-1766, <https://doi.org/10.5194/amt-9-1755-2016>, 2016.
